# Supplementary material for: A Reassessment of Copy Number Variations in Congenital Heart Defects: Picturing the Whole Genome
Source: MDPI journal article supplement (doi:10.3390/genes12071048), 2021-07-08
Supplement: s1 [file s1]

# A Reassessment of Copy Number Variations in Congenital Heart Defects

## Picturing the whole genome

Ilse Meerschaut, Sarah Vergult, Annelies Dheedene, Björn Menten, Katya De Groote, Hans De Wilde,  
Laura Muiño Mosquera, Joseph Panzer, Kristof Vandekerckhove, Paul J. Coucke, Daniël De Wolf,  
Bert Callewaert.

Correspondence to: Bert Callewaert, Center for Medical Genetics, Ghent University Hospital, C.  
Heymanslaan 10, 9000 Ghent, Belgium. Email: Bert.Callewaert@UGent.be. Phone: +32 9 332 3603.

**Supplemental Table S2. Heart defects in the study cohort**

**Supplemental Table S3. Pathogenic CNVs in the study cohort**

**Supplemental Table S4. CNV-US in the study cohort and subgroups**

**Supplemental Table S5. Candidate CHD protein-coding genes in CNV-US**

**Supplemental Table S7. LncRNA genes of interest in CNV-US**

**Supplemental Table S2. Heart defects in the study cohort**

|                                              | All patients |             | SCHD patients |              | ICHHD patients |              |
|----------------------------------------------|--------------|-------------|---------------|--------------|----------------|--------------|
| <b>All types of congenital heart defects</b> | <b>270</b>   | <b>100%</b> | <b>87</b>     | <b>32.2%</b> | <b>183</b>     | <b>67.8%</b> |
| Ventricular septal defect                    | 51           | 18.9%       | 27            | 31.0%        | 24             | 13.1%        |
| Aortic coarctation and arch abnormality      | 42           | 15.6%       | 11            | 12.6%        | 31             | 16.9%        |
| Tetralogy of Fallot                          | 39           | 14.4%       | 10            | 11.5%        | 29             | 15.8%        |
| Transposition of the great arteries          | 37           | 13.7%       | 0             | 0%           | 37             | 20.2%        |
| Functionally univentricular heart            | 27           | 10.0%       | 10            | 11.5%        | 17             | 9.3%         |
| Atrial septal defect                         | 14           | 5.2%        | 8             | 9.2%         | 6              | 3.3%         |
| Left ventricular outflow tract abnormality   | 11           | 4.1%        | 4             | 4.6%         | 7              | 3.8%         |
| Double outlet right ventricle                | 11           | 4.1%        | 2             | 2.3%         | 9              | 4.9%         |
| Right ventricular outflow tract abnormality  | 8            | 3.0%        | 2             | 2.3%         | 6              | 3.3%         |
| Atrioventricular septal defect               | 7            | 2.6%        | 2             | 2.3%         | 5              | 2.7%         |
| Isomerism                                    | 6            | 2.2%        | 6             | 6.9%         | 0              | 0%           |
| Pulmonary vein abnormality                   | 5            | 1.9%        | 1             | 1.1%         | 4              | 2.2%         |
| Ebstein malformation                         | 4            | 1.5%        | 3             | 3.4%         | 1              | 0.5%         |
| Truncus arteriosus                           | 4            | 1.5%        | 1             | 1.1%         | 3              | 1.6%         |
| Pulmonary atresia intact septum              | 2            | 0.7%        | 0             | 0%           | 2              | 1.1%         |
| Congenital corrected transposition           | 1            | 0.4%        | 0             | 0%           | 1              | 0.5%         |
| Cor triatriatum                              | 1            | 0.4%        | 0             | 0%           | 1              | 0.5%         |

**Supplemental Table S3. Pathogenic CNVs in the study cohort**

| Pathogenic copy number variants in individuals with SCHD                                    | Type of congenital heart defect   |
|---------------------------------------------------------------------------------------------|-----------------------------------|
| 22q11.2 recurrent (DGS/VCFS) region (proximal, A-D) (ISCA-37446) – deletion (MIM 188400)    | Atrial septal defect              |
| 22q11.2 recurrent (DGS/VCFS) region (proximal, A-D) (ISCA-37446) – deletion (MIM 188400)    | Ventricular septal defect         |
| 22q11.2 recurrent (DGS/VCFS) region (proximal, A-D) (ISCA-37446) – deletion (MIM 188400)    | Ventricular septal defect         |
| 22q11.2 recurrent (DGS/VCFS) region (proximal, A-D) (ISCA-37446) – deletion (MIM 188400)    | Tetralogy of Fallot               |
| 22q11.2 recurrent (DGS/VCFS) region (proximal, A-D) (ISCA-37446) – deletion (MIM 188400)    | Tetralogy of Fallot               |
| 22q11.2 recurrent (DGS/VCFS) region (proximal, A-D) (ISCA-37446) – deletion (MIM 188400)    | Tetralogy of Fallot               |
| 22q11.2 recurrent (DGS/VCFS) region (proximal, A-D) (ISCA-37446) – deletion (MIM 188400)    | Functionally univentricular heart |
| 22q11.2 recurrent region (central, B/C-D) (ISCA-37516) - deletion                           | Ventricular septal defect         |
| 22q11.2 recurrent region (distal type I, D-E/F) (ISCA-37397) – deletion (MIM 611867)        | Aortic coarctation                |
| 22q11.2 recurrent (DGS/VCFS) region (proximal, A-D) (ISCA-37446) – duplication (MIM 608363) | Ventricular septal defect         |
| 7q11.23 recurrent (Williams-Beuren syndrome) region (ISCA-37392) – deletion (MIM 194050)    | LVOT abnormality                  |
| 7q11.23 recurrent (Williams-Beuren syndrome) region (ISCA-37392) – deletion (MIM 194050)    | LVOT abnormality                  |
| 7q11.23 recurrent (Williams-Beuren syndrome) region (ISCA-37392) – deletion (MIM 194050)    | LVOT abnormality                  |
| 7q11.23 recurrent (Williams-Beuren syndrome) region (ISCA-37392) – deletion (MIM 194050)    | LVOT abnormality                  |
| 17q21.3 recurrent region (ISCA-37420) – deletion (MIM 610443)                               | Atrial septal defect              |
| 17p11.2 recurrent (SMS/PLS) region (ISCA-37418) - duplication (MIM 610883)                  | Functionally univentricular heart |
| 4p16.3 terminal (Wolf Hirschhorn syndrome) region (ISCA-37429) – deletion (MIM 194190)      | Atrial septal defect              |
| All CNV-US were mapped to reference genome GRCh37 (hg19)                                    |                                   |

**Supplemental Table S4. CNV-US in the study cohort and subgroups**

| CNV-US                             | Subgroup | CNV-US                              | Subgroup |
|------------------------------------|----------|-------------------------------------|----------|
| chr1:17241750-17393588dup          | ICHD     | chr10:88004601-88065186del          | SCHD     |
| <b>chr1:45993451-46050273dup</b>   | SCHD     | chr10:128458646-128823028del        | ICHD     |
| <b>chr1:86488537-87236743dup</b>   | SCHD     | chr11:33192074-33421736dup          | SCHD     |
| chr1:92464376-92606671dup          | SCHD     | chr11:40618648-40742235del          | ICHD     |
| chr1:100110001-100545000dup        | ICHD     | chr11:55050707-56931087dup          | ICHD     |
| <b>chr1:145388355-145832995dup</b> | SCHD     | chr11:76670039-76777036dup          | ICHD     |
| <b>chr1:165562486-166482444dup</b> | ICHD     | chr11:106050001-106260000del        | ICHD     |
| chr1:175448847-175726807dup        | ICHD     | chr12:21547800-21644501dup          | ICHD     |
| chr1:247740001-248565000dup        | ICHD     | <b>chr12:77616529-79689969del</b>   | ICHD     |
| chr2:14701626-15159618dup          | SCHD     | chr12:87900001-88080000dup          | SCHD     |
| chr2:44507915-44579904del          | ICHD     | chr13:61711359-62962420dup          | SCHD     |
| chr2:49545371-49629804del          | ICHD     | chr13:92966240-93046389dup          | ICHD     |
| chr2:60998688-61093639dup          | ICHD     | <b>chr13:114843912-115105238del</b> | ICHD     |
| chr2:68685528-68915775dup          | ICHD     | <b>chr14:21902947-21909605dup</b>   | ICHD     |
| <b>chr2:70439112-70488413del</b>   | ICHD     | chr14:27650380-27799841del          | SCHD     |
| chr2:86447244-86537744dup          | ICHD     | chr14:35110121-35167580del          | ICHD     |
| <b>chr2:88257759-89016165trip</b>  | ICHD     | <b>chr14:41234593-41536386del</b>   | ICHD     |
| <b>chr2:101521192-101659259dup</b> | SCHD     | <b>chr14:53326238-54313294dup</b>   | ICHD     |
| <b>chr2:106878050-108441524dup</b> | SCHD     | <b>chr15:22755001-23085000del</b>   | ICHD     |
| chr2:112650001-112740000del        | ICHD     | <b>chr15:22765628-23208842dup</b>   | ICHD     |
| chr2:149079154-149313760dup        | SCHD     | <b>chr15:22765628-23167699del</b>   | ICHD     |
| <b>chr2:186857026-187327501del</b> | ICHD     | <b>chr15:22765628-23208842dup</b>   | ICHD     |
| chr2:236075658-236458404trip       | ICHD     | chr15:24005491-24470088dup          | ICHD     |
| chr3:4337407-4357235del            | SCHD     | <b>chr15:29872834-30019045dup</b>   | ICHD     |
| chr3:30882231-30974326dup          | ICHD     | chr15:51739647-51791693trip         | ICHD     |
| chr3:60431642-60690267dup          | SCHD     | <b>chr15:95701920-97765966dup</b>   | SCHD     |
| chr3:108850038-108948062dup        | SCHD     | chr16:258392-462341dup              | SCHD     |
| <b>chr3:169521817-170020490dup</b> | ICHD     | <b>chr16:5030678-5546770del</b>     | ICHD     |
| chr3:192385902-192488655dup        | SCHD     | chr16:7830001-8055000dup            | ICHD     |
| chr4:120033531-120113986dup        | ICHD     | <b>chr16:14968855-16292181del</b>   | ICHD     |
| chr4:131146744-132525235dup        | ICHD     | <b>chr16:29656684-30197290del</b>   | ICHD     |
| chr4:135455435-137460949dup        | ICHD     | <b>chr16:86409444-86509316del</b>   | ICHD     |
| chr4:135700662-135829279dup        | SCHD     | <b>chr17:9981738-10410275dup</b>    | SCHD     |
| chr4:187171324-187294087dup        | ICHD     | <b>chr17:15257416-15482813dup</b>   | SCHD     |
| chr4:187333416-187518707dup        | ICHD     | <b>chr17:18148172-18662098dup</b>   | SCHD     |
| <b>chr5:1005001-1290000dup</b>     | SCHD     | chr17:58372095-58588996dup          | ICHD     |
| chr5:68595931-68635696trip         | SCHD     | chr18:23904986-23996644dup          | SCHD     |
| <b>chr5:122233184-122489348dup</b> | ICHD     | <b>chr18:39451438-39554147dup</b>   | ICHD     |
| <b>chr5:151095022-151482286dup</b> | ICHD     | chr18:50883661-51084413dup          | SCHD     |
| chr5:180119112-180218463dup        | ICHD     | chr18:65727205-66532484dup          | SCHD     |
| <b>chr6:4269700-4465244del</b>     | ICHD     | chr18:75104351-75387552dup          | ICHD     |
| chr6:17670001-17805000dup          | SCHD     | chr18:77733413-77762403dup          | ICHD     |

|                                    |      |                                       |        |
|------------------------------------|------|---------------------------------------|--------|
| chr6:86004058-86204900dup          | SCHD | <b>chr19:15850613-15978604dup</b>     | SCHD   |
| chr6:90315001-90510000dup          | ICHD | chr19:23778647-23950181del            | ICHD   |
| chr6:91188432-91351703dup          | SCHD | <b>chr19:58980970-59092515del</b> mos | SCHD   |
| chr6:140957317-141785879dup        | ICHD | <b>chr20:67778-439387dup</b>          | ICHD   |
| chr6:162130733-162799322del        | SCHD | chr20:9736328-9968799dup              | ICHD   |
| chr7:9600001-9780000del            | SCHD | chr20:14928568-15182995del            | SCHD   |
| chr7:11221210-12462629dup          | SCHD | <b>chr20:32820001-33045000trip</b>    | ICHD   |
| chr7:12300173-12462629del          | ICHD | <b>chr20:47471691-47625126del</b>     | SCHD   |
| chr7:24335739-24416109del          | ICHD | <b>chr21:43014314-48090258del</b>     | ICHD   |
| chr7:40152590-40256612dup          | ICHD | <b>chr21:47591379-47671404dup</b>     | ICHD   |
| chr7:55305001-55440000del          | ICHD | chr22:25102007-25247453dup            | ICHD   |
| <b>chr7:69330737-69584704del</b>   | SCHD | <b>chrX:61091-437220del</b>           | ICHD * |
| chr7:81972080-82369067dup          | ICHD | chrX:481940-638810dup                 | ICHD   |
| chr7:133070210-133120414del        | ICHD | chrX:908162-1259089trip               | ICHD   |
| <b>chr7:151800001-151905000dup</b> | ICHD | chrX:6467006-8131751dup               | ICHD * |
| chr8:62035047-62172054del          | ICHD | chrX:6467006-8131751del               | SCHD * |
| <b>chr8:77880001-78240000dup</b>   | ICHD | chrX:7515001-8130000dup               | ICHD   |
| chr8:140830000-141140000dup        | SCHD | chrX:17388654-17417102dup             | SCHD * |
| <b>chr8:142131562-142255482dup</b> | SCHD | chrX:19491688-19601181dup             | ICHD   |
| chr9:195001-405000dup              | ICHD | chrX:22944987-23031936del             | SCHD   |
| <b>chr9:210001-540000dup</b>       | ICHD | chrX:83974189-84378746dup             | ICHD * |
| <b>chr9:12515544-13415849del</b>   | SCHD | <b>chrX:130610000-130950000dup</b>    | ICHD   |
| <b>chr9:107409506-107729796dup</b> | ICHD | <b>chrX:130631863-130960558dup</b>    | ICHD * |
| <b>chr9:107409509-107769094dup</b> | ICHD | chrX:138183513-138735042dup           | ICHD * |
| chr10:1201103-1273934dup           | ICHD | chrX:148886475-149084873dup           | ICHD * |
| chr10:65690000-66491000dup         | SCHD | <b>chrY:61091-819199del</b>           | ICHD   |
| chr10:84054763-84073574del         | ICHD | chrY:23730419-24426917del             | SCHD   |

CNV-US potentially related to CHD pathogenesis based on the elements studied are marked in bold.

X-chromosomal CNV-US occurring in females are marked with \*.

All CNV-US were mapped to reference genome GRCh37(hg19).

**Supplemental Table S5. Candidate CHD protein-coding genes in CNV-US**

| CNV-US                       | Protein-coding gene            | Interpretation            |                                                                                                                                                                                                                                        |
|------------------------------|--------------------------------|---------------------------|----------------------------------------------------------------------------------------------------------------------------------------------------------------------------------------------------------------------------------------|
| Chr1:45993451-46050273dup    | <i>NASP</i>                    | Chromatin                 | -                                                                                                                                                                                                                                      |
| Chr2:70439112-70488413del    | <i>TIA1</i>                    | FGF                       | -                                                                                                                                                                                                                                      |
| Chr2:101521192-101659259dup  | <i>NPAS2</i>                   | TF                        | -                                                                                                                                                                                                                                      |
| Chr7:69330737-69584704del    | <i>AUTS2</i>                   | Ras, histone              | Potentially linked to mild heart defects <sup>1</sup>                                                                                                                                                                                  |
| Chr7:151800001-151905000dup  | <i>KMT2C</i>                   | Histone                   | Kleefstra syndrome 2 (MIM 617768) ; candidate CHD gene <sup>2</sup>                                                                                                                                                                    |
| Chr13:114843912-115105238del | <i>CHAMP1</i>                  | TF                        | -                                                                                                                                                                                                                                      |
| Chr14:21902947-21909605dup   | <i>CHD8</i>                    | CHD panel, WNT, chromatin | Interacts with CHD7 <sup>3</sup> ; expressed during rat postnatal cardiac development <sup>4</sup>                                                                                                                                     |
| Chr14:53326238-54313294dup   | <i>FERMT2</i>                  | WNT, TGFβ, sarcomere      | -                                                                                                                                                                                                                                      |
| Chr15:22755001-23085000del   | <i>CYFIP1</i>                  | Ras                       | -                                                                                                                                                                                                                                      |
| Chr15:22765628-23167699del   | <i>CYFIP1</i>                  | Ras                       | -                                                                                                                                                                                                                                      |
| Chr15:29872834-30019045dup   | <i>TJPI</i>                    | Hippo                     | Role in formation of gap junctions in rat cardiomyocytes <sup>5</sup> ; association of ZO-1 with Cx43 in cardiac myocytes <sup>6</sup> ; Cx43 knockout mice exhibit conotruncal malformations and coronary artery defects <sup>7</sup> |
| Chr16:14968855-16292181del   | <i>MYH11</i>                   | CHD panel                 | Related to thoracic aortic aneurysm / aortic dissection and PDA <sup>8</sup> ; role in mesenchymal and endothelial cell differentiation, associated with valvulogenesis and endothelial to mesenchymal transition <sup>9</sup>         |
| Chr16:29656684-30197290del   | <i>MAPK3</i><br><i>MAZ</i>     | BMP, FGF, histone<br>TF   | Linked to cardiac hypertrophy in transgenic mouse <sup>10</sup><br>Transcriptional regulator of muscle-specific genes in cardiac myocytes <sup>11</sup>                                                                                |
| Chr18:39451438-39554147dup   | <i>PIK3C3</i>                  | Cilium                    | Essential role in regulating autophagy and heart function <sup>12</sup>                                                                                                                                                                |
| Chr19:58980970-59092515del   | <i>TRIM28</i>                  | Ras                       | Regulator of cardiomyocyte differentiation in murine embryonic stem cells <sup>13</sup> ; regulates sprouting angiogenesis in zebrafish <sup>14</sup>                                                                                  |
| Chr20:32820001-33045000trip  | <i>ITCH</i>                    | Notch                     | -                                                                                                                                                                                                                                      |
| Chr20:47471691-47625126del   | <i>ARFGEF2</i>                 | Ras, cilium               | Linked to vascular development in zebrafish <sup>15</sup>                                                                                                                                                                              |
| Chr21:43014314-48090258del   | <i>PKNOX1</i><br><i>ZBTB21</i> | TF<br>TF                  | PBX-related genes are candidates for CHD <sup>16</sup><br>Potential role in CHD pathogenesis in Down syndrome <sup>17</sup>                                                                                                            |

TF = transcription factor ; BMP = bmp signaling pathway ; WNT = wnt signaling pathway ; Notch = notch signaling pathway ; TGFβ = transforming growth factor β receptor signaling pathway ; Hippo = hippo signaling ; FGF = fibroblast growth factor receptor signaling pathway ; Ras = ras protein signal transduction ; Histone = histone modification ; Chromatin = chromatin remodeling.  
All CNV-US were mapped to reference genome GRCh37 (hg19).

1. Beunders G, van de Kamp J, Vasudevan P, et al. A detailed clinical analysis of 13 patients with AUTS2 syndrome further delineates the phenotypic spectrum and underscores the behavioural phenotype. *J Med Genet.* 2016;53(8):523-532.
2. Szot JO, Cuny H, Blue GM, et al. A Screening Approach to Identify Clinically Actionable Variants Causing Congenital Heart Disease in Exome Data. *Circ Genom Precis Med.* 2018;11(3):e001978.
3. Batsukh T, Pieper L, Koszucka AM, et al. CHD8 interacts with CHD7, a protein which is mutated in CHARGE syndrome. *Hum Mol Genet.* 2010;19(14):2858-2866.
4. Shanks MO, Lund LM, Manni S, Russell M, Mauban JR, Bond M. Chromodomain helicase binding protein 8 (Chd8) is a novel A-kinase anchoring protein expressed during rat cardiac development. *PLoS One.* 2012;7(10):e46316.
5. Wu JC, Tsai RY, Chung TH. Role of catenins in the development of gap junctions in rat cardiomyocytes. *J Cell Biochem.* 2003;88(4):823-835.
6. Toyofuku T, Yabuki M, Otsu K, Kuzuya T, Hori M, Tada M. Direct association of the gap junction protein connexin-43 with ZO-1 in cardiac myocytes. *J Biol Chem.* 1998;273(21):12725-12731.
7. Rhee DY, Zhao XQ, Francis RJ, Huang GY, Mably JD, Lo CW. Connexin 43 regulates epicardial cell polarity and migration in coronary vascular development. *Development.* 2009;136(18):3185-3193.

8. Zhu L, Vranckx R, Khau Van Kien P, et al. Mutations in myosin heavy chain 11 cause a syndrome associating thoracic aortic aneurysm/aortic dissection and patent ductus arteriosus. *Nat Genet.* 2006;38(3):343-349.
9. Lu CC, Liu MM, Clinton M, Culshaw G, Argyle DJ, Corcoran BM. Developmental pathways and endothelial to mesenchymal transition in canine myxomatous mitral valve disease. *Vet J.* 2015;206(3):377-384.
10. Lorenz K, Schmitt JP, Schmitteckert EM, Lohse MJ. A new type of ERK1/2 autophosphorylation causes cardiac hypertrophy. *Nat Med.* 2009;15(1):75-83.
11. Himeda CL, Ranish JA, Hauschka SD. Quantitative proteomic identification of MAZ as a transcriptional regulator of muscle-specific genes in skeletal and cardiac myocytes. *Mol Cell Biol.* 2008;28(20):6521-6535.
12. Jaber N, Dou Z, Chen JS, et al. Class III PI3K Vps34 plays an essential role in autophagy and in heart and liver function. *Proc Natl Acad Sci U S A.* 2012;109(6):2003-2008.
13. Gan L, Schwengberg S, Denecke B. Transcriptome analysis in cardiomyocyte-specific differentiation of murine embryonic stem cells reveals transcriptional regulation network. *Gene Expr Patterns.* 2014;16(1):8-22.
14. Wang Y, Singh AR, Zhao Y, et al. TRIM28 regulates sprouting angiogenesis through VEGFR-DLL4-Notch signaling circuit. *Faseb j.* 2020;34(11):14710-14724.
15. Lu FI, Wang YT, Wang YS, Wu CY, Li CC. Involvement of BIG1 and BIG2 in regulating VEGF expression and angiogenesis. *Faseb j.* 2019;33(9):9959-9973.
16. Arrington CB, Dowse BR, Bleyl SB, Bowles NE. Non-synonymous variants in pre-B cell leukemia homeobox (PBX) genes are associated with congenital heart defects. *Eur J Med Genet.* 2012;55(4):235-237.
17. Sailani MR, Makrythanasis P, Valsesia A, et al. The complex SNP and CNV genetic architecture of the increased risk of congenital heart defects in Down syndrome. *Genome Res.* 2013;23(9):1410-1421.

**Supplemental Table S7. LncRNA genes of interest in CNV-US**

| CNV-US                        | lncRNA of interest with TPM 2 (TPM10) in developing human heart                                                                                                                                                                                                                                                                                                                   |
|-------------------------------|-----------------------------------------------------------------------------------------------------------------------------------------------------------------------------------------------------------------------------------------------------------------------------------------------------------------------------------------------------------------------------------|
| Chr1:86488537-87236743dup     | lnc-ODF2L-32, lnc-SELENOF-2                                                                                                                                                                                                                                                                                                                                                       |
| Chr1:145388355-145832995dup   | LIX1L-AS1                                                                                                                                                                                                                                                                                                                                                                         |
| Chr1:165562486-166482444dup   | lnc-TMCO1-1, lnc-UCK2-1                                                                                                                                                                                                                                                                                                                                                           |
| Chr2:88257759-89016165trip    | lnc-RPIA-2                                                                                                                                                                                                                                                                                                                                                                        |
| Chr2:101521192-101659259dup   | lnc-TBC1D8-7                                                                                                                                                                                                                                                                                                                                                                      |
| Chr2:106878050-108441524dup   | ST6GAL2-IT1                                                                                                                                                                                                                                                                                                                                                                       |
| Chr2:186857026-187327501del   | LINC01473                                                                                                                                                                                                                                                                                                                                                                         |
| Chr3:169521817-170020490dup   | SEC62-AS1                                                                                                                                                                                                                                                                                                                                                                         |
| Chr5:1005001—1290000dup       | <b>lnc-SLC12A7-5</b>                                                                                                                                                                                                                                                                                                                                                              |
| Chr5:122233184-122489348dup   | lnc-PPIC-1                                                                                                                                                                                                                                                                                                                                                                        |
| Chr5:151095022-151482286dup   | lnc-ATOX1-1, lnc-G3BP1-1, lnc-GLRA1-1                                                                                                                                                                                                                                                                                                                                             |
| Chr6:4269700-4465244del       | <b>lnc-ECI2-2</b>                                                                                                                                                                                                                                                                                                                                                                 |
| Chr7:151800001-151905000dup   | lnc-KMT2C-1                                                                                                                                                                                                                                                                                                                                                                       |
| Chr8:142131562-142255482dup   | lnc-SLC45A4-2, lnc-SLC45A4-3                                                                                                                                                                                                                                                                                                                                                      |
| Chr9:210001-540000dup         | lnc-DOCK8-1                                                                                                                                                                                                                                                                                                                                                                       |
| Chr9:12515544-13415849del     | lnc-NFIB-1                                                                                                                                                                                                                                                                                                                                                                        |
| Chr9:107409506-107729796dup   | lnc-NIPSNAP3B-1                                                                                                                                                                                                                                                                                                                                                                   |
| Chr9:107409509-107769094dup   | lnc-NIPSNAP3B-1                                                                                                                                                                                                                                                                                                                                                                   |
| Chr12:77616529-79689969del    | lnc-ZDHHC17-20                                                                                                                                                                                                                                                                                                                                                                    |
| Chr14:41234593-41536386del    | LINC02315                                                                                                                                                                                                                                                                                                                                                                         |
| Chr15:22765628-23208842dup    | <b>lnc-NIPA1-2</b>                                                                                                                                                                                                                                                                                                                                                                |
| Chr15:22765628-23167699del    | <b>lnc-NIPA1-2</b>                                                                                                                                                                                                                                                                                                                                                                |
| Chr15:22765628-23208842dup    | <b>lnc-NIPA1-2</b>                                                                                                                                                                                                                                                                                                                                                                |
| Chr15:95701920-97765966dup    | LINC01197, LINC02157, lnc-NR2F2-1, lnc-NR2F2-2, lnc-NR2F2-15, lnc-PGPEP1L-60, NR2F2-AS1                                                                                                                                                                                                                                                                                           |
| Chr16:14968855-16292181del    | lnc-ABCC1-1, lnc-C16orf45-1, <b>lnc-C16orf45-4</b>                                                                                                                                                                                                                                                                                                                                |
| Chr16:29656684-30197290del    | lnc-ASPHD1-1, lnc-CDIPT-1, lnc-PPP4C-10, lnc-PPP4C-11                                                                                                                                                                                                                                                                                                                             |
| Chr16:86409444-86509316del    | FENDRR                                                                                                                                                                                                                                                                                                                                                                            |
| Chr17:9981738-10410275dup     | lnc-ADPRM-2                                                                                                                                                                                                                                                                                                                                                                       |
| Chr17:15257416-15482813dup    | lnc-CDRT4-4                                                                                                                                                                                                                                                                                                                                                                       |
| Chr17:18148172-18662098dup    | lnc-MIEF2-1, <b>lnc-TBC1D28-1</b> , lnc-TBC1D28-6                                                                                                                                                                                                                                                                                                                                 |
| Chr19:15850613-15978604dup    | UCA1                                                                                                                                                                                                                                                                                                                                                                              |
| Chr20:67778-439387dup         | <b>NRSN2-AS1</b>                                                                                                                                                                                                                                                                                                                                                                  |
| Chr20:32820001-33045000trip   | ITCH-IT1, lnc-EIF2S2-4                                                                                                                                                                                                                                                                                                                                                            |
| Chr21:43014314-48090258del    | COL18A1-AS1, COL18A1-AS2, DIP2A-IT1, ITGB2-AS1, <b>LINC00205</b> , LINC00316, LINC00479, LINC01424, LINC01679, lnc-C2CD2-1, lnc-COL6A1-1, lnc-CRYAA-2, <b>lnc-FAM207A-2</b> , lnc-FAM207A-10, <b>lnc-LRRC3-5</b> , <b>lnc-LSS-1</b> , lnc-PTTG1IP-7, lnc-RSPH1-1, <b>lnc-SLC19A1-7</b> , lnc-WDR4-1, lnc-WDR4-2, lnc-WDR4-4, lnc-YBEY-5, LRRC3-DT, PICSAR, TSPEAR-AS1, TSPEAR-AS2 |
| Chr21:47591379-47671404dup    | lnc-YBEY-5                                                                                                                                                                                                                                                                                                                                                                        |
| ChrX:61091-437220del          | <b>LINC00685</b> , lnc-PLCXD1-5, lnc-PLCXD1-6                                                                                                                                                                                                                                                                                                                                     |
| ChrX:130610000-130950000dup   | FIRRE                                                                                                                                                                                                                                                                                                                                                                             |
| ChrX:130631863-130960558dup * | FIRRE                                                                                                                                                                                                                                                                                                                                                                             |

lncRNA genes expressed in developing human heart tissue reaching TPM10 are marked in bold.

X-chromosomal CNV-US occurring in females are marked with \*.

CNV-US were mapped to reference genome GRCh37 (hg19).
